# Supplementary material
Source: publisher figshare collection journal article supplement (https://acs.figshare.com/ndownloader/files/3777442)
Supplement: Supplementary file 1 [file 3777442]

Supporting information

## **Bendable ITO-free Organic Solar Cells with Highly Conductive and Flexible PEDOT:PSS Electrodes on Plastic Substrates**

*Xi Fan,<sup>†</sup> Jinzhao Wang,<sup>‡</sup> Hanbin Wang,<sup>†</sup> Xiang Liu,<sup>†</sup> Hao Wang<sup>†,\*</sup>*

<sup>†</sup>Hubei Collaborative Innovation Center for Advanced Organic Chemical Materials, Faculty of Physics and Electronic Science, Hubei University, P. R. China

<sup>‡</sup>Department of Material Science and Engineering, Hubei University, Wuhan 430062, P. R. China

Corresponding Author

\*E-mail: [nanoguy@126.com](mailto:nanoguy@126.com).

**Fig. S1** *R* values of the treated films on glass substrates: (a) EG; (b) methanol; (c) MSA; (d) EG/MSA; (e) methanol/MSA.

**Fig. S2** a) Ca/Al films without any bending treatment, b) Ca/Al films after the 100 time bending treatment. Scale bar: 100  $\mu\text{m}$ .

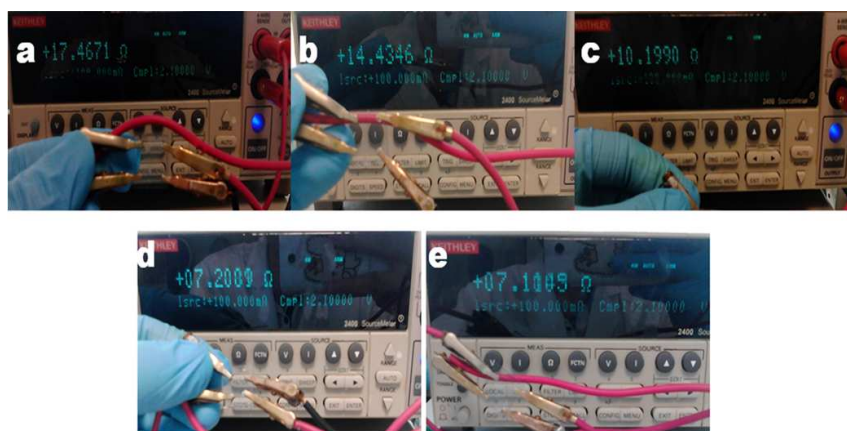

**Fig. S1**

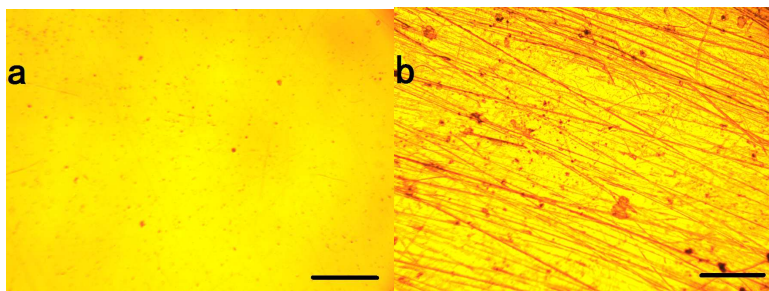

**Fig. S2**
